# Supplementary material
Source: PubMed Central journal article supplement (PMC4650153)
Supplement: rspb20151561supp1.pdf [file rspb20151561supp1.pdf]

1 **Figure S1.** Latitudinal variation in the number of significant positive (white), significant  
2 negative (black) or non-significant effects (grey) of (a) temperature or (b) precipitation upon  
3 species' populations, summarised by 5 degree bins.

4

5 **Figure S2.** Consistency in the relationships between a) temperature and b) precipitation and  
6 species' demographic responses across taxa. The graphs show fitted lines from a generalised  
7 linear mixed model with a latitude x taxa interaction. Relationships identified by thick lines  
8 are statistically significant ( $P < 0.05$ ) when considered in isolation. Direction of effect values  
9  $> 0.5$  describe increasingly positive relationships between the climate variable and  
10 demographic responses, and values  $< 0.5$  are for increasingly negative relationships. Values of  
11 0.5 indicate either no significant impacts, or an equal number of positive and negative effects.  
12 Fitted lines are extended only over the latitudinal range of the studies that examined either  
13 precipitation or temperature effects for each taxon. The number of separate population time-  
14 series contributing to each taxon-specific relationship is in parentheses.

15

16 a)

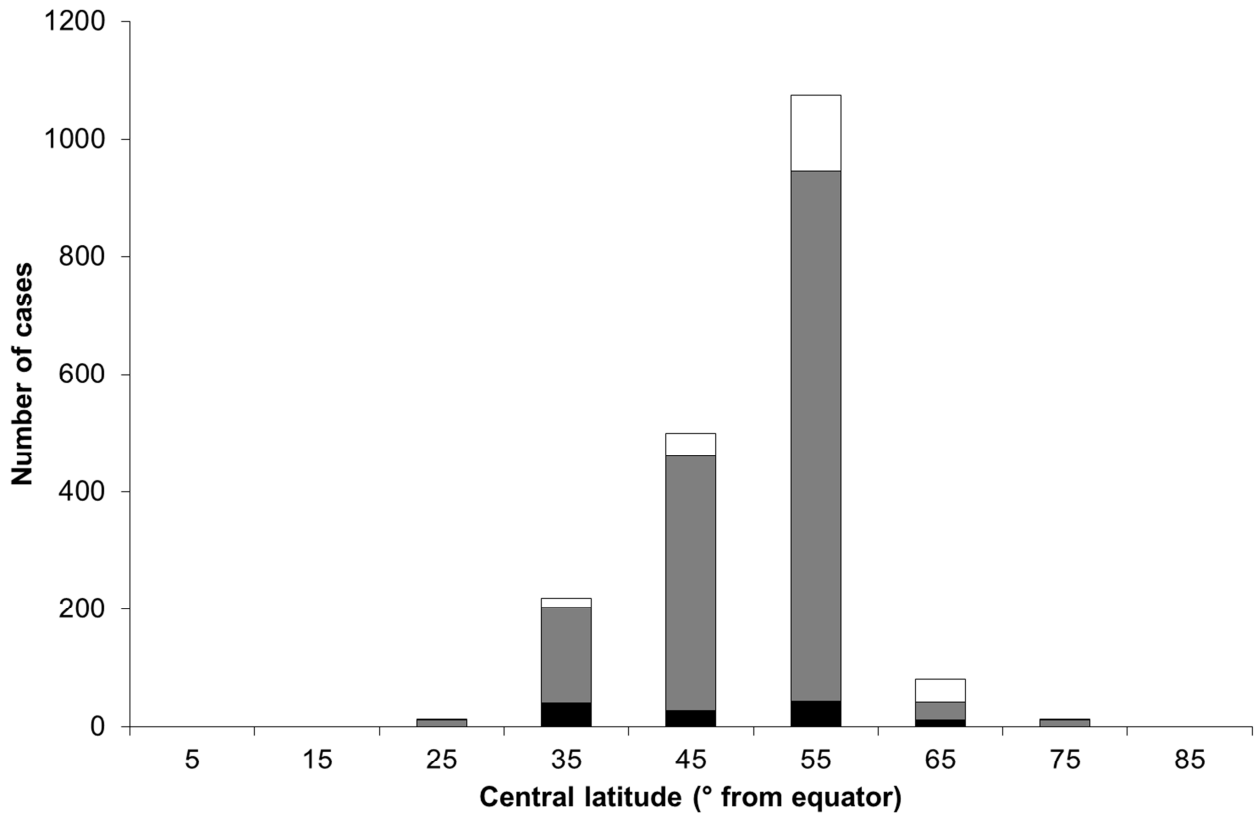

17 b)  
18

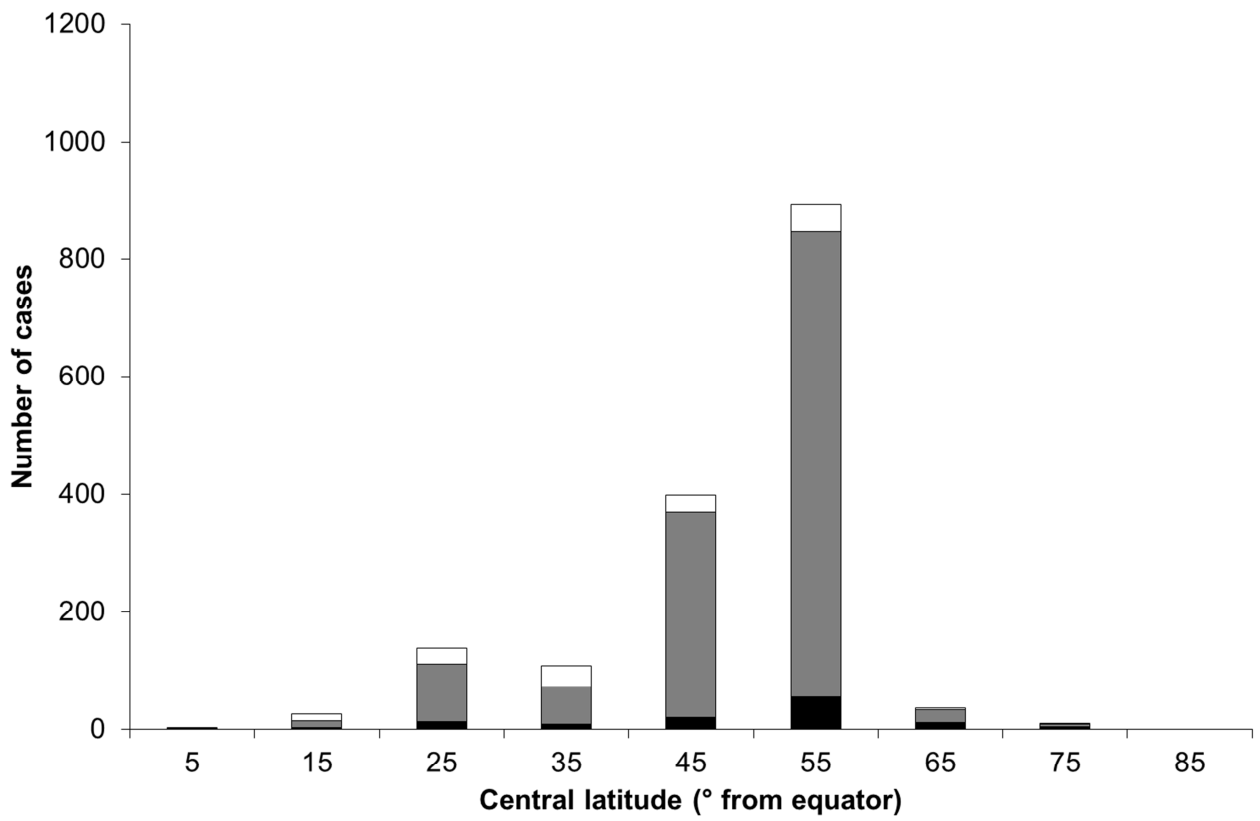

19  
20

21  
22

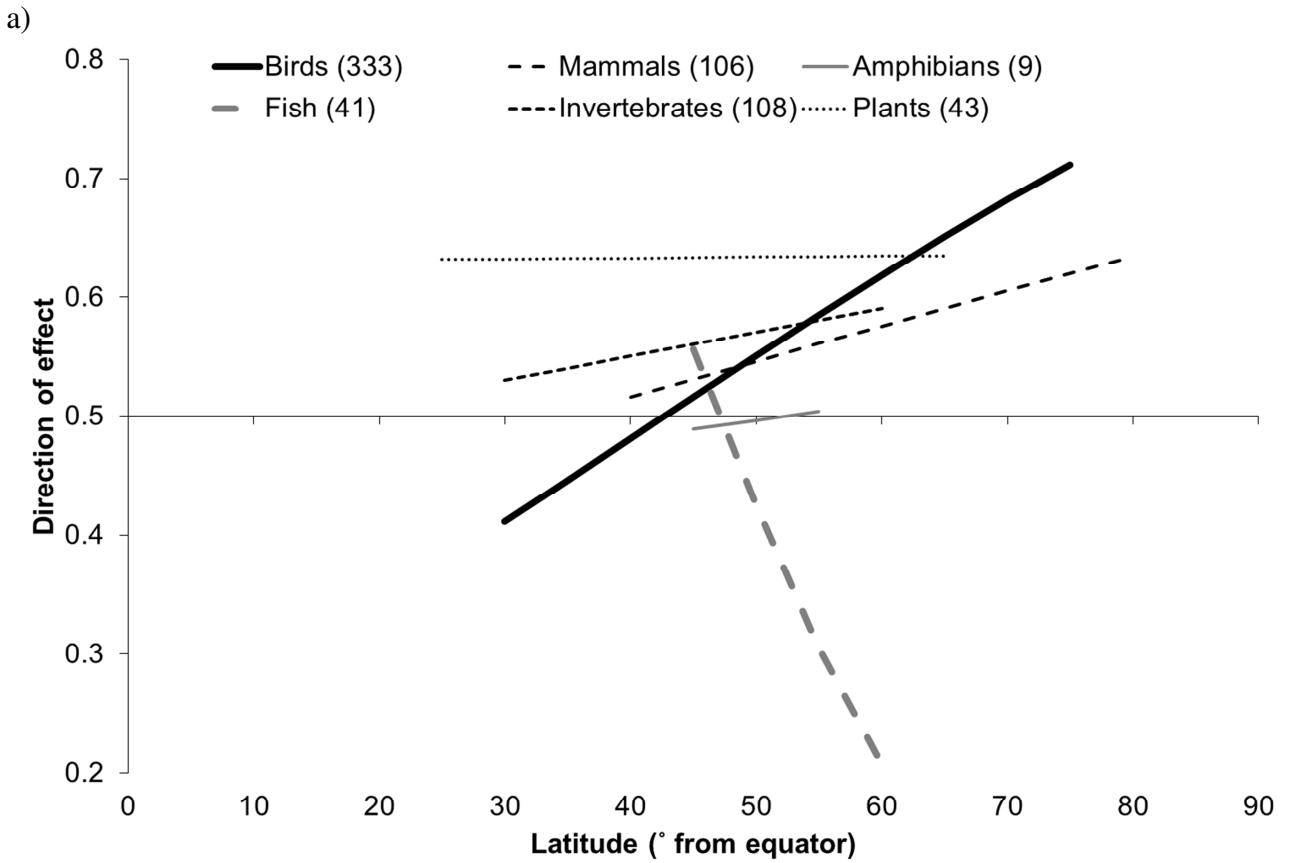

23  
24

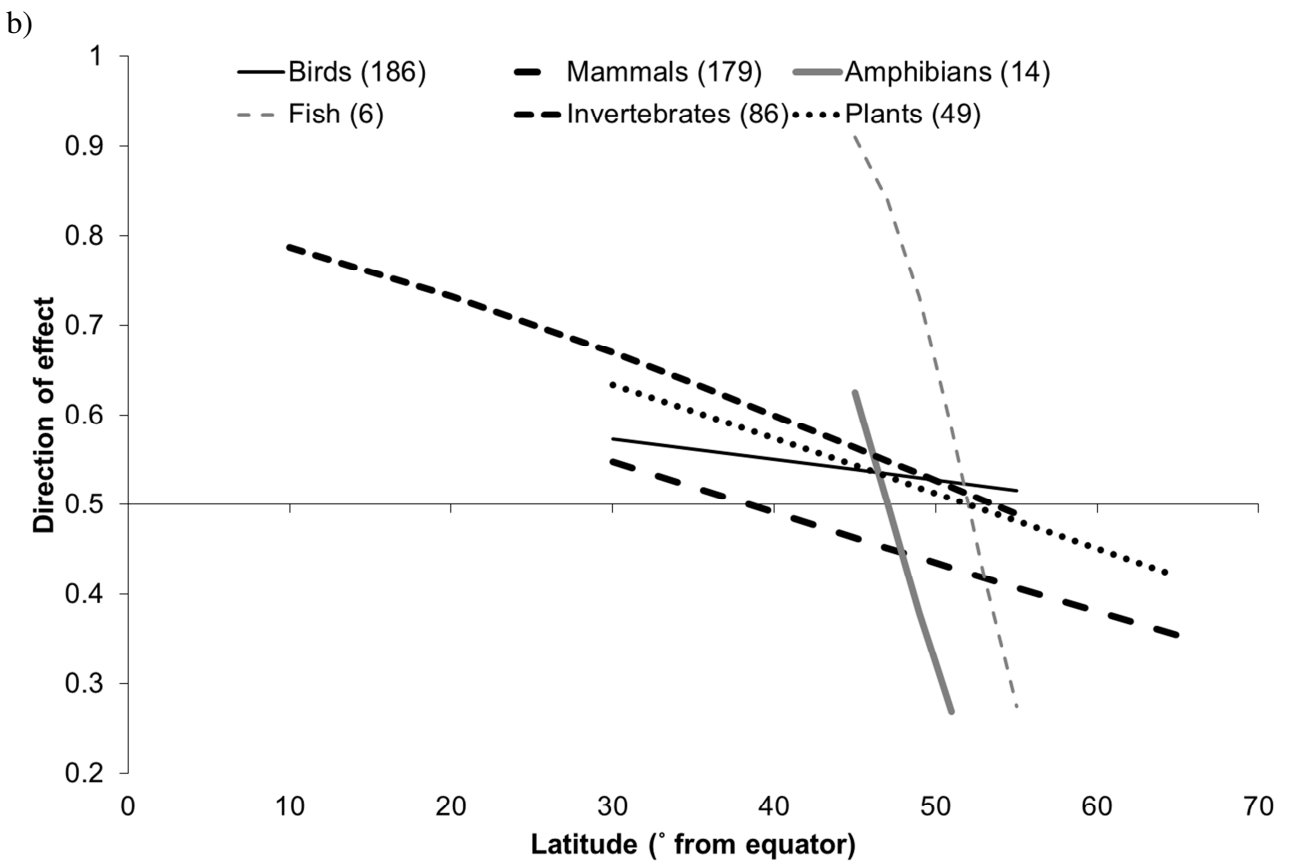

25  
26  
27
