# Supplementary material
Source: PubMed Central journal article supplement (PMC4650153)
Supplement: rspb20151561supp2.pdf [file rspb20151561supp2.pdf]

**Table S1** Details of studies used in analysis

| <b>Authors</b>                 | <b>Climate variable</b>     | <b>Duration (years)</b> | <b>Taxonomic grouping</b> | <b>Latitude</b> |
|--------------------------------|-----------------------------|-------------------------|---------------------------|-----------------|
| Aanes <i>et al.</i> 2000       | Temperature & Precipitation | 21                      | Mammal                    | 78.9°N          |
| Aanes <i>et al.</i> 2002       | Temperature & Precipitation | 21                      | Mammal                    | 78.9°N          |
| Adamík & Král 2008             | Temperature                 | 26                      | Bird & Mammal             | 49.5°N          |
| Ahola <i>et al.</i> 2009       | Temperature                 | 56                      | Bird                      | 60.8°N          |
| Altwegg <i>et al.</i> 2006     | Precipitation               | 67                      | Bird                      | 46.8°N          |
| Anders & Post 2006             | Temperature                 | 37                      | Bird                      | 37.1°N          |
| Artemyev 2008                  | Temperature                 | 27                      | Bird                      | 60.5°N          |
| Askeyev <i>et al.</i> 2005     | Temperature & Precipitation | 55                      | Plant                     | 55.5°N          |
| Bender & Weisenberger 2005     | Precipitation               | 36                      | Mammal                    | 33.5°N          |
| Cattadori <i>et al.</i> 2005   | Temperature & Precipitation | 155                     | Bird                      | 54°N            |
| Chase <i>et al.</i> 2005       | Temperature & Precipitation | 21                      | Bird                      | 38.1°N          |
| Clews <i>et al.</i> 2010       | Temperature & Precipitation | 20                      | Fish                      | 52.3°N          |
| Clotfelter <i>et al.</i> 2007  | Temperature & Precipitation | 20                      | Bird                      | 37.2°N          |
| Conner <i>et al.</i> 2005      | Precipitation               | 20                      | Bird                      | 31.2°N          |
| Conrad <i>et al.</i> 2003      | Temperature & Precipitation | 32                      | Invertebrate              | 52.8°N          |
| Coughenour & Singer 1996       | Temperature & Precipitation | 23                      | Mammal                    | 45°N            |
| Cowley & Siriwardena 2005      | Temperature & Precipitation | 25                      | Bird                      | 53.2°N          |
| Dolonec 2007                   | Temperature                 | 23                      | Bird                      | 46°N            |
| Dunham <i>et al.</i> 2011      | Precipitation               | 20                      | Mammal                    | 21.3°N          |
| Dyrcz & Halupka 2009           | Temperature & Precipitation | 38                      | Bird                      | 51.5°N          |
| Falls <i>et al.</i> 2007       | Temperature                 | 36                      | Mammal                    | 45.4°N          |
| Fox & Gitay 1991               | Temperature & Precipitation | 27                      | Bird                      | 56.3°N          |
| Friedenberg <i>et al.</i> 2008 | Temperature                 | 39                      | Invertebrate              | 31.5°N          |
| Geisser & Reyer 2005           | Precipitation               | 25                      | Mammal                    | 47.6°N          |
| Gerlach 2007                   | Precipitation               | 102                     | Invertebrate              | 9.4°S           |
| Gerten & Adrian 2002           | Temperature                 | 20                      | Invertebrate              | 52.3°N          |
| Gilbert & Raedeke 2004         | Temperature & Precipitation | 20                      | Mammal                    | 46.8°N          |
| Glenn <i>et al.</i> 2011a      | Temperature & Precipitation | 21                      | Bird                      | 45.7°N          |
| Glenn <i>et al.</i> 2011b      | Temperature & Precipitation | 20                      | Bird                      | 43.9°N          |
| Grau & Veblen 2000             | Precipitation               | 95                      | Plant                     | 27°S            |
| Greenwood & Baillie 1991       | Temperature & Precipitation | 26                      | Bird                      | 52.4°N          |
| Halkka <i>et al.</i> 2006      | Temperature & Precipitation | 35                      | Invertebrate              | 59.5°N          |

| <b>Authors</b>                  | <b>Climate variable</b>     | <b>Duration (years)</b> | <b>Taxonomic grouping</b> | <b>Latitude</b> |
|---------------------------------|-----------------------------|-------------------------|---------------------------|-----------------|
| Halupka <i>et al.</i> 2008      | Temperature                 | 37                      | Bird                      | 51.5°N          |
| Hari <i>et al.</i> 2006         | Temperature                 | 25                      | Fish                      | 46.8°N          |
| Hersteinsson <i>et al.</i> 2009 | Temperature                 | 27                      | Mammal                    | 65°N            |
| Hone & Clutton-Brock 2007       | Precipitation               | 27                      | Mammal                    | 57°N            |
| Hudon <i>et al.</i> 2010        | Temperature & Precipitation | 20                      | Fish                      | 45.5°N          |
| Hušek & Adamík 2008             | Temperature & Precipitation | 41                      | Bird                      | 50.2°N          |
| Jovani & Tella 2004             | Temperature & Precipitation | 23                      | Bird                      | 37°N            |
| Kangur <i>et al.</i> 2007       | Temperature                 | 74                      | Fish                      | 58.7°N          |
| Kardol <i>et al.</i> 2010       | Temperature                 | 39                      | Plant                     | 35.6°N          |
| Kelsall <i>et al.</i> 2004      | Temperature & Precipitation | 81                      | Plant                     | 43°N            |
| Kharuk <i>et al.</i> 2005       | Temperature                 | 34                      | Plant                     | 64°N            |
| Klaus 2007                      | Temperature & Precipitation | 32                      | Bird                      | 49°N            |
| Kivana <i>et al.</i> 2004       | Temperature & Precipitation | 132                     | Mammal                    | 48.2°N          |
| Kullman 2007                    | Temperature                 | 32                      | Plant                     | 63.1°N          |
| Laaksonen <i>et al.</i> 2006    | Temperature & Precipitation | 59                      | Bird                      | 60.3°N          |
| Layne & Abrahamson 2004         | Temperature & Precipitation | 28                      | Plant                     | 27.1°N          |
| Lehikoinen <i>et al.</i> 2009   | Temperature & Precipitation | 25                      | Bird                      | 63°N            |
| Lehikoinen <i>et al.</i> 2011   | Temperature                 | 32                      | Bird                      | 63°N            |
| Lewellen & Vessey 1998a         | Temperature & Precipitation | 23                      | Mammal                    | 41.3°N          |
| Lewellen & Vessey 1998b         | Temperature & Precipitation | 23                      | Mammal                    | 41.3°N          |
| Li & Brown 1999                 | Temperature & Precipitation | 25                      | Bird                      | 42°N            |
| Lima <i>et al.</i> 2008         | Precipitation               | 23                      | Mammal                    | 31.6°N          |
| Lloyd & Fastie 2003             | Temperature                 | 198                     | Plant                     | 64.2°N          |
| Lusk <i>et al.</i> 2002         | Temperature & Precipitation | 20                      | Bird                      | 31.9°N          |
| Macdonald <i>et al.</i> 2010    | Temperature & Precipitation | 21                      | Mammal                    | 51.5°N          |
| Magnusson <i>et al.</i> 2010    | Precipitation               | 22                      | Mammal                    | 2.3°S           |
| Mallory <i>et al.</i> 2003      | Temperature & Precipitation | 27                      | Bird                      | 51°N            |
| Manca & DeMott 2009             | Temperature                 | 22                      | Invertebrate              | 46°N            |
| Manca <i>et al.</i> 2007        | Temperature                 | 22                      | Invertebrate              | 46°N            |
| Martin 2007                     | Precipitation               | 20                      | Bird & Plant              | 34.4°N          |
| Massol <i>et al.</i> 2007       | Temperature                 | 31                      | Fish                      | 46.6°N          |
| Matthysen <i>et al.</i> 2011    | Temperature                 | 29                      | Bird                      | 51.2°N          |
| McGrath & Lorenzen 2010         | Temperature & Precipitation | 22                      | Amphibian                 | 52.8°N          |
| Meyer <i>et al.</i> 1998        | Precipitation               | 27                      | Amphibian                 | 47°N            |

| <b>Authors</b>                    | <b>Climate variable</b>     | <b>Duration (years)</b> | <b>Taxonomic grouping</b> | <b>Latitude</b> |
|-----------------------------------|-----------------------------|-------------------------|---------------------------|-----------------|
| Morrisette <i>et al.</i> 2010     | Temperature & Precipitation | 30                      | Bird                      | 73.1°N          |
| Moss <i>et al.</i> 2001           | Temperature                 | 24                      | Bird                      | 52.2°N          |
| Murray <i>et al.</i> 2006         | Temperature & Precipitation | 40                      | Mammal                    | 48.5°N          |
| Mysterud <i>et al.</i> 2007       | Temperature & Precipitation | 50                      | Mammal                    | 52.5°N          |
| Nevoux <i>et al.</i> 2008         | Precipitation               | 22                      | Bird                      | 45.9°N          |
| Nilsson <i>et al.</i> 2011        | Temperature & Precipitation | 31                      | Bird                      | 58.2°N          |
| Ogutu & Owen-Smith 2003           | Precipitation               | 20                      | Mammal                    | 23.8°S          |
| Ogutu & Owen-Smith 2005           | Precipitation               | 32                      | Mammal                    | 23.8°S          |
| Owen-Smith & Mills 2006           | Precipitation               | 20                      | Mammal                    | 23.8°S          |
| Parker 1993                       | Temperature & Precipitation | 54                      | Plant                     | 32.1°N          |
| Paxton <i>et al.</i> 2004         | Temperature                 | 47                      | Fish                      | 54.2°N          |
| Paxton <i>et al.</i> 2009         | Temperature & Precipitation | 49                      | Fish                      | 54.2°N          |
| Peach <i>et al.</i> 1994          | Temperature & Precipitation | 59                      | Bird                      | 52.8°N          |
| Peach <i>et al.</i> 1995          | Temperature & Precipitation | 21                      | Bird                      | 53.2°N          |
| Pearce-Higgins <i>et al.</i> 2009 | Temperature & Precipitation | 28                      | Bird                      | 53.2°N          |
| Pearce-Higgins <i>et al.</i> 2010 | Temperature                 | 34                      | Bird                      | 53.3°N          |
| Pellet <i>et al.</i> 2006         | Temperature & Precipitation | 22                      | Amphibian                 | 46.5°N          |
| Pérez-Ramos <i>et al.</i> 2010    | Temperature & Precipitation | 26                      | Plant                     | 43.4°N          |
| Piha <i>et al.</i> 2007           | Temperature & Precipitation | 20                      | Bird                      | 61.1°N          |
| Piovesan & Adams 2001             | Precipitation               | 105                     | Plant                     | 46.6°N          |
| Potti 2009                        | Temperature                 | 24                      | Bird                      | 41°N            |
| Pucek <i>et al.</i> 1993          | Temperature & Precipitation | 21                      | Mammal                    | 52.4°N          |
| Pukkaka <i>et al.</i> 2010        | Temperature & Precipitation | 50                      | Plant                     | 65°N            |
| Reading 2007                      | Temperature                 | 23                      | Amphibian                 | 50.4°N          |
| Redfern & Hunter 2005             | Temperature & Precipitation | 36                      | Invertebrate              | 50.5°N          |
| Rehmeier <i>et al.</i> 2005       | Temperature & Precipitation | 20                      | Mammal                    | 39.1°N          |
| Reif <i>et al.</i> 2010           | Temperature                 | 26                      | Bird                      | 49.8°N          |
| Robillard & Fox 2006              | Temperature                 | 24                      | Fish                      | 44.2°N          |
| Robinson <i>et al.</i> 2004       | Temperature & Precipitation | 37                      | Bird                      | 54°N            |
| Robinson <i>et al.</i> 2007       | Temperature & Precipitation | 35                      | Bird                      | 54°N            |
| Roy <i>et al.</i> 2001            | Temperature & Precipitation | 22                      | Invertebrate              | 52.8°N          |
| Schaub <i>et al.</i> 2011         | Temperature & Precipitation | 26                      | Bird                      | 48.4°N          |
| Schorcht <i>et al.</i> 2009       | Temperature                 | 20                      | Mammal                    | 50.4°N          |
| Schwartz & Armitage 2005          | Temperature & Precipitation | 29                      | Mammal                    | 38.9°N          |

| <b>Authors</b>               | <b>Climate variable</b>     | <b>Duration (years)</b> | <b>Taxonomic grouping</b> | <b>Latitude</b> |
|------------------------------|-----------------------------|-------------------------|---------------------------|-----------------|
| Selås 2001                   | Temperature & Precipitation | 65                      | Bird                      | 58.7°N          |
| Sherriff <i>et al.</i> 2011  | Temperature & Precipitation | 242                     | Invertebrate              | 60°N            |
| Shone <i>et al.</i> 2006     | Temperature & Precipitation | 34                      | Invertebrate              | 38.6°N          |
| Simpson <i>et al.</i> 2007   | Precipitation               | 27                      | Mammal                    | 30.7°N          |
| Smatas <i>et al.</i> 2008    | Temperature & Precipitation | 28                      | Invertebrate              | 55.4°N          |
| Sokolov <i>et al.</i> 2002   | Temperature                 | 32                      | Bird                      | 55.2°N          |
| Solberg <i>et al.</i> 2001   | Temperature & Precipitation | 21                      | Mammal                    | 78°N            |
| Surmacki & Stepniewski 2007  | Temperature & Precipitation | 20                      | Bird                      | 51.5°N          |
| Suski & Ridgway 2007         | Temperature                 | 22                      | Fish                      | 45.4°N          |
| Szeicz & MacDonald 1995      | Temperature                 | 310                     | Plant                     | 64.5°N          |
| Thingstad <i>et al.</i> 2006 | Temperature & Precipitation | 20                      | Bird                      | 63°N            |
| Tratalos <i>et al.</i> 2010  | Precipitation               | 58                      | Invertebrate              | 19.5°N          |
| Visser <i>et al.</i> 2006    | Temperature                 | 20                      | Bird                      | 52.1°N          |
| Vucetich & Peterson 2004     | Temperature & Precipitation | 40                      | Mammal                    | 48°N            |
| Wang <i>et al.</i> 2002a     | Temperature & Precipitation | 25                      | Bird                      | 40.3°N          |
| Wang <i>et al.</i> 2002b     | Temperature & Precipitation | 35                      | Mammal                    | 40.3°N          |
| Watson <i>et al.</i> 1998    | Temperature & Precipitation | 53                      | Bird                      | 57.1°N          |
| Watson <i>et al.</i> 2000    | Temperature                 | 50                      | Bird                      | 57.1°N          |
| Wedekind & Kueng 2010        | Temperature                 | 39                      | Fish                      | 46.5°N          |
| Whitfield <i>et al.</i> 2008 | Temperature & Precipitation | 24                      | Bird                      | 53.3°N          |
| Whittaker & Tribe 1998       | Temperature & Precipitation | 21                      | Invertebrate              | 54.7°N          |
| Wilson <i>et al.</i> 2011    | Temperature                 | 26                      | Bird                      | 37.1°N          |
| Winkler <i>et al.</i> 2002   | Temperature                 | 21                      | Bird                      | 37.1°N          |
| Woodward <i>et al.</i> 1994  | Temperature & Precipitation | 30                      | Plant                     | 45.2°N          |
| Wool 2002                    | Temperature & Precipitation | 21                      | Invertebrate              | 32.1°N          |
| Wrege <i>et al.</i> 2006     | Temperature                 | 21                      | Bird                      | 38°N            |
| Wright <i>et al.</i> 2009    | Temperature & Precipitation | 34                      | Bird                      | 52.3°N          |
| Yalden & Pearce-Higgins 1997 | Temperature & Precipitation | 24                      | Bird                      | 53.2°N          |
| Yamamura <i>et al.</i> 2006  | Temperature                 | 52                      | Invertebrate              | 36.2°N          |
| Zhang <i>et al.</i> 2010     | Precipitation               | 26                      | Mammal                    | 28.9°N          |
| Zhang <i>et al.</i> 2003     | Precipitation               | 51                      | Mammal                    | 42.5°N          |
| Zmihorski <i>et al.</i> 2006 | Temperature & Precipitation | 24                      | Bird                      | 52°N            |

## References

- Aanes, R., Sæther, B.E. & Øritsland, N.A. 2000. Fluctuations of an introduced population of Svalbard reindeer: the effects of density dependence and climatic variation. *Ecography*, **23**, 437-443.
- Aanes, R., Sæther, B.E., Smith, F.M., Cooper, E.J., Wookey, P.A. & Øritsland, N.A. 2002. The Arctic Oscillation predicts effects of climate change in two trophic levels in a high-arctic ecosystem. *Ecology Letters*, **5**, 445-453.
- Adamík, P., Král, M. 2008. Climate- and resource-driven long-term changes in dormice populations negatively affect hole-nesting songbirds. *Journal of Zoology*, **275**, 209-215.
- Ahola, M.P., Laaksonen, T., Eeva, T. & Lehikoinen, E. 2009. Great tits lay increasingly smaller clutches than selected for: a study of climate-and density-related changes in reproductive traits. *Journal of Animal Ecology*, **78**, 1298-1306.
- Altwegg, R., Roulin, A., Kestenholz, M. & Jenni, L. 2006. Demographic effects of extreme winter weather in the barn owl. *Oecologia*, **149**, 44-51.
- Anders, A.D. & Post, E. 2006. Distribution-wide effects of climate on population densities of a declining migratory landbird. *Journal of Animal Ecology*, **75**, 221-227.
- Artemyev, A.V. 2008. Factors responsible for the long-term dynamics of the Pied Flycatcher *Ficedula hypoleuca* populations in the taiga of Karelia, Russia. *Acta Ornithologica*, **43**, 10-16
- Askeyev, O.V., Tischin, D., Sparks, T.H. & Askeyev, I.V. 2005. The effect of climate on the phenology, acorn crop and radial increment of pedunculate oak (*Quercus robur*) in the middle Volga region, Tatarstan, Russia. *International Journal of Biometeorology*, **49**, 262-266.
- Bender, L.C. & Weisenberger, M.E. 2005. Precipitation, density, and population dynamics of desert bighorn sheep on San Andres National Wildlife Refuge, New Mexico. *Wildlife Society Bulletin*, **33**, 956-964.
- Cattadori, I.M., Haydon, D.T. & Hudson, P.J. 2005. Parasites and climate synchronize red grouse populations. *Nature*, **433**, 737-741.
- Chase, M.K., Nur, N. & Guepel, G.R. 2005. Effects of weather and population density on reproductive success and population dynamics in a song sparrow (*Melospiza melodia*) population: a long-term study. *The Auk*, **122**, 571-592.
- Clews, E., Durance, I., Vaughan, I.P. & Ormerod, S.J. 2010. Juvenile salmonid populations in a temperate river system track synoptic trends in climate. *Global Change Biology*, **16**, 3271-3283.
- Clotfelter, E.D., Pedersen, A.B., Cranford, J.A., Ram, N., Snajdr, E.A., Nolan, V. Jr & Ketterson, E.D. 2007. Acorn mast drives long-term dynamics of rodent and songbird populations. *Oecologia*, **154**, 493-503.
- Conner, R.N., Saenz, D., Schaefer, R.R., McCormick, J.R., Rudolph, D.C. & Burt, D.B. 2005. Rainfall, El Niño, and reproduction of red-cockaded woodpeckers. *Southeastern Naturalist*, **4**, 347-354.
- Conrad, K.F., Woiwod, I.P. & Perry, J.N. 2003. East Atlantic teleconnection pattern and the decline of a common arctiid moth. *Global Change Biology*, **9**, 125-130.

- Coughenour, M.B. & Singer, F.J. 1996. Elk population processes in Yellowstone National Park under the policy of natural regulation. *Ecological Applications*, **6**, 573-593.
- Cowley, E. & Siriwardena, G.M. 2005. Long-term variation in survival rates of Sand Martins *Riparia riparia*: dependence on breeding and wintering ground weather, age and sex, and their population consequences. *Bird Study*, **52**, 237–251.
- Dolenec, Z. 2007. Spring temperatures in relation to laying dates and clutch size of the blue tit (*Parus caeruleus*) in Croatia. *Wilson Journal of Ornithology*, **119**, 299-301
- Dunham, A.E., Erhart, E.M. & Wright, P.C. 2011. Global climate cycles and cyclones: consequences for rainfall patterns and lemur reproduction in southeastern Madagascar. *Global Change Biology*, **17**, 219-227.
- Dyrz, A., Halupka, L. 2009. The response of the Great Reed Warbler *Acrocephalus arundinaceus* to climate change. *Journal of Ornithology*, **150**, 39-44.
- Falls, J.B., Falls, E.A. & Fryxell, J.M. 2007. Fluctuations of deer mice in Ontario in relation to seed crops. *Ecological Monographs*, **77**, 19-32.
- Fox, A.D. & Gitay, H. 1991. Breeding success in Greenland Barnacle Geese *Branta leucopsis* wintering in Islay, Scotland. *Ardea*, **79**, 359–364.
- Friedenberg, N.A., Sarkar, S., Kouchoukos, N., Billings, R.F. & Ayres, M.P. 2008. Temperature Extremes, Density Dependence, and Southern Pine Beetle (Coleoptera: Curculionidae) Population Dynamics in East Texas. *Environmental Entomology*, **37**, 650–659.
- Geisser, H. & Reyer, H.-U. 2005. The influence of food and temperature on population density of wild boar *Sus scrofa* in the Thurgau (Switzerland). *Journal of Zoology*, **267**, 89–96.
- Gerlach, J. 2007. Short-term climate change and the extinction of the snail *Rhachistia aldabrae* (Gastropoda: Pulmonata). *Biology Letters*, **3**, 581–585.
- Gerten, D. & Adrian, R. 2002. Species-specific changes in the phenology and peak abundance of freshwater copepods in response to warmer summers. *Freshwater Biology*, **47**, 2163-2173.
- Gilbert, B.A. & Raedeke, K.J. 2004. Recruitment dynamics of black-tailed deer in the western Cascades. *Journal of Wildlife Management*, **68**, 120-128.
- Glenn, E.M., Anthony, R.G., Forsman, E.D. & Olson, G.S. 2011a. Reproduction of northern spotted owls: the role of local weather and regional climate. *The Journal of Wildlife Management*, **75**, 1279-1294.
- Glenn, E.M., Anthony, R.G., Forsman, E.D. & Olson, G.S. (2011b) Local weather, regional climate, and annual survival of the northern spotted owl. *The Condor*, **113**, 150-158.
- Grau, H.R. & Veblen, T.T. 2000. Rainfall variability, fire and vegetation dynamics in neotropical montane ecosystems in north-western Argentina. *Journal of Biogeography*, **27**, 1107-1121.
- Greenwood, J.J.D. & Baillie, S.R. 1991. Effects of density-dependence and weather on population changes of English passerines using a non-experimental paradigm. *Ibis*, **133**, 121–133.

- Halkka, A., Halkka, L., Halkka, O., Roukka, K. & Pokki, J. 2006. Lagged effects of North Atlantic Oscillation on spittlebug *Philaenus spumarius* (Homoptera) abundance and survival. *Global Change Biology*, **12**, 2250–2262.
- Halupka, L., Dyrzcz, A. & Borowiec, M. 2008. Climate change affects breeding of reed warblers *Acrocephalus scirpaceus*. *Journal of Avian Biology*, **39**, 95–100.
- Hari, R.E., Livingstone, D.M., Siber, R., Burkhardt-Holm, P. & Guettinger, H. 2006. Consequences of climatic change for water temperature and brown trout populations in Alpine rivers and streams. *Global Change Biology*, **12**, 10–26.
- Hersteinsson, P., Yom-Tov, Y. & Geffen, E. 2009. Effect of Sub-Polar Gyre, North Atlantic Oscillation and ambient temperature on size and abundance in the Icelandic Arctic fox. *Global Change Biology*, **15**, 1423–1433.
- Hone, J. & Clutton-Brock, T.H. 2007. Climate, food, density and wildlife population growth rate. *Journal of Animal Ecology*, **76**, 361–367.
- Hudon, C., Armellin, A., Gagnon, P. & Patoine, A. (2010) Variations in water temperatures and levels in the St. Lawrence River (Québec, Canada) and potential implications for three common fish species. *Hydrobiologia*, **647**, 145–161.
- Hušek, J. & Adamík, P. 2008. Long-term trends in the timing of breeding and brood size in the red-backed shrike *Lanius collurio* in the Czech Republic, 1964–2004. *Journal of Ornithology*, **149**, 97–103.
- Jovani, R. & Tella, J.L. 2004. Age-related environmental sensitivity and weather mediated nestling mortality in white storks *Ciconia ciconia*. *Ecography*, **27**, 611–618.
- Kangur, A., Kangur, P., Kangur, K. & Möls, T. 2007. The role of temperature in the population dynamics of smelt *Osmerus eperlanus eperlanus* m. spirinchus Pallas in Lake Peipsi (Estonia/Russia). In: *Shallow Lakes in a Changing World* (eds: Gulati RD, Lammens E, Pauw ND, Donk EV), pp433–441. Springer Netherlands.
- Kardol, P., Todd, D.E., Hanson, P.J. & Mulholland, P.J. 2010. Long-term successional forest dynamics: species and community responses to climatic variability. *Journal of Vegetation Science*, **21**, 627–642.
- Kelsall, N., Hazard, C. & Leopold, D.J. 2004. Influence of climate factors on demographic changes in the New York populations of the federally-listed *Phyllitis scolopendrium* (L.) Newm. var. *americana*. *Journal of the Torrey Botanical Society*, **131**, 161–168.
- Kharuk, V.I., Dvinskaya, M.L., Ranson, K.J. & Im, S.T. 2005. Expansion of Evergreen Conifers to the Larch-Dominated Zone and Climatic Trends. *Russian Journal of Ecology*, **36**, 164–170.
- Klaus, S. 2007. A 33-year study of Hazel grouse *Bonasa bonasia* in the Bohemian Forest, Šumava, Czech Republic: effects of weather on density in autumn. *Wildlife Biology*, **13**, 105–108.
- Klvana, I., Berteaux, D. & Cazelles, B. 2004. Porcupine feeding scars and climatic data show ecosystem effects of the solar cycle. *The American Naturalist*, **164**, 283–297.
- Kullman, L. 2007. Tree line population monitoring of *Pinus sylvestris* in the Swedish Scandes, 1973–2005: implications for tree line theory and climate change ecology. *Journal of Ecology*, **95**, 41–52.

- Laaksonen, T., Ahola, M., Eeva, T., Väisänen, R.A. & Lehikoinen, E. 2006. Climate change, migratory connectivity and changes in laying date and clutch size of the pied flycatcher. *Oikos*, **114**, 277-290.
- Layne, J.N. & Abrahamson, W.G. 2004. Long-term trends in annual reproductive output of the scrub hickory: factors influencing variation in size of nut crop. *American Journal of Botany*, **91**, 1378–1386.
- Lehikoinen, A., *et al.* 2009. Reproduction of the common buzzard at its northern range margin under climatic change. *Oikos*, **118**, 829–836.
- Lehikoinen, A. *et al.* 2011. The impact of climate and cyclic food abundance on the timing of breeding and brood size in four boreal owl species. *Oecologia*, **165**, 349–355.
- Lewellen, R. H. & Vessey, S.H. 1998a. Modelling biotic and abiotic influences on population size in small mammals. *Oecologia*, **113**, 210-218.
- Lewellen, R.H. & Vessey, S.H. 1998b. The effect of density dependence and weather on population size of a polyvoltine species. *Ecological Monographs*, **68**, 571–594.
- Li, S.-H. & Brown, J.L. 1999. Influence of Climate on Reproductive Success in Mexican Jays. *The Auk*, **116**, 924–936.
- Lima, M., Ernest, S.M., Brown, J.H., Belgrano, A & Stenseth, N.C. 2008. Chihuahuan Desert kangaroo rats: nonlinear effects of population dynamics, competition, and rainfall. *Ecology*, **89**, 2594-2603.
- Lloyd, A.H. & Fastie, C.L. 2003. Recent changes in treeline forest distribution and structure in interior Alaska. *Ecoscience*, **10**, 176-185
- Lusk, J.J., Guthery, F.S., George, R.R., Peterson, M.J. & DeMaso, S.J. 2002. Relative Abundance of Bobwhites in Relation to Weather and Land Use. *The Journal of Wildlife Management*, **66**, 1040.
- McGrath, A. & Lorenzen, K. 2010. Management history and climate as key factors driving natterjack toad population trends in Britain. *Animal Conservation*, **13**, 483-494.
- MacDonald, D.W., Newman, C., Buesching, C.D. & Nouvellet, P. 2010. Are badgers ‘Under The Weather’? Direct and indirect impacts of climate variation on European badger (*Meles meles*) population dynamics. *Global Change Biology*, **16**, 2913-2922.
- Magnusson, W.E., Layme, V.M. & Lima, A.P. 2010. Complex effects of climate change: population fluctuations in a tropical rodent are associated with the southern oscillation index and regional fire extent, but not directly with local rainfall. *Global Change Biology*, **16**, 2401-2406.
- Mallory, M.L., Venier, L.A. & McKenney, D. 2003. Winter weather and waterfowl surveys in north-western Ontario, Canada. *Journal of Biogeography*, **30**, 441–448.
- Manca, M.M., Portogallo, M. & Brown, M.E. 2007. Shifts in phenology of *Bythotrephes longimanus* and its modern success in Lake Maggiore as a result of changes in climate and trophy. *Journal of Plankton Research*, **29**, 515–525.
- Manca, M. & DeMott, W.R. 2009. Response of the invertebrate predator *Bythotrephes* to a climate-linked increase in the duration of a refuge from fish predation. *Limnology and Oceanography*, **54**, 2506-2512.



- Martin, T.E. 2007. Climate correlates of 20 years of trophic changes in a high-elevation riparian system. *Ecology*, **88**, 367-380.
- Massol, F., David, P., Gerdeaux, D. & Jarne, P. 2007. The influence of trophic status and large-scale climatic change on the structure of fish communities in Perialpine lakes. *Journal of Animal Ecology*, **76**, 538–551.
- Matthysen, E., Adriaensen, F. & Dhondt, A.A. 2011. Multiple responses to increasing spring temperatures in the breeding cycle of blue and great tits (*Cyanistes caeruleus*, *Parus major*). *Global Change Biology* **17**, 1-16.
- Meyer, A.H., Schmidt, B.R. & Grossenbacher, K. 1998. Analysis of three amphibian populations with quarter-century long time-series. *Proceedings of the Royal Society of London. Series B: Biological Sciences*, **265**, 523–528.
- Morrissette, M., Bêty, J., Gauthier, G., Reed, A. & Lefebvre, J. 2010. Climate, trophic interactions, density dependence and carry-over effects on the population productivity of a migratory Arctic herbivorous bird. *Oikos*, **119**, 1181-1191.
- Moss, R., Oswald, J. & Baines, D. 2001. Climate change and breeding success: decline of the capercaillie in Scotland. *Journal of Animal Ecology*, **70**, 47–61.
- Murray, D.L., Cox, E.W., Ballard, W.B., Whitlaw, H.A., Lenarz, M.S., Custer, T.W., Barnett, T. & Fuller, T.K. (2006) Pathogens, nutritional deficiency, and climate influences on a declining moose population. *Wildlife Monographs*, **166**, 1-30.
- Mysterud, A. *et al.* 2007. Population ecology and conservation of endangered megafauna: the case of European bison in Białowieża Primeval Forest, Poland. *Animal Conservation*, **10**, 77–87.
- Nevoux, M., Barbraud, J.C. & Barbraud, C. 2008. Nonlinear impact of climate on survival in a migratory white stork population. *Journal of Animal Ecology*, **77**, 1143-1152.
- Nilsson, A.L.K., Knudsen, E., Jerstad, K., Røstad, O.W., Walseng, B., Slagsvold, T. & Stenseth, N.C. 2011. Climate effects on population fluctuations of the white-throated dipper *Cinclus cinclus*. *Journal of Animal Ecology*, **80**, 235–243.
- Ogutu, J.O. & Owen-Smith, N. 2003. ENSO, rainfall and temperature influences on extreme population declines among African savanna ungulates. *Ecology Letters*, **6**, 412–419.
- Ogutu, J.O. & Owen-Smith, N. 2005. Oscillations in large mammal populations: are they related to predation or rainfall? *African Journal of Ecology*, **43**, 332-339.
- Owen-Smith, N. & Mills, M.G.L. 2006. Manifold interactive influences on the population dynamics of a multispecies ungulate assemblage. *Ecological Monographs*, **76**, 73–92.
- Parker, K.C. 1993. Climatic effects on regeneration trends for two columnar cacti in the northern Sonoran Desert. *Annals of the Association of American Geographers*, **83**, 452-474.
- Paxton, C.G.M., Winfield, I.J., Fletcher, J.M., George, D.G. & Hewitt, D.P. 2004. Biotic and abiotic influences on the recruitment of male perch in Windermere, U.K. *Journal of Fish Biology*, **65**, 1622–1642.

- Paxton, C.G.M., Winfield, I.J., Fletcher, J.M., George, D.G. & Hewitt, D.P. 2009. Investigation of first year biotic and abiotic influences on the recruitment of pike *Esox lucius* over 48 years in Windermere, U.K. *Journal of Fish Biology*, **74**, 2279–2298.
- Peach, W.J., Thompson, P.S. & Coulson, J.C. 1994. Annual and Long-Term Variation in the Survival Rates of British Lapwings *Vanellus vanellus*. *Journal of Animal Ecology*, **63**, 60.
- Peach, W., Feu, C.D. & McMeeking, J. 1995. Site tenacity and survival rates of Wrens *Troglodytes troglodytes* and Treecreepers *Certhia familiaris* in a Nottinghamshire wood. *Ibis*, **137**, 497-507.
- Pearce-Higgins, J.W., Yalden, D.W., Dougall, T.W. & Beale, C.M. 2009. Does climate change explain the decline of a trans-Saharan Afro-Palaeartic migrant? *Oecologia*, **159**, 649-659.
- Pearce-Higgins, J.W., Dennis, P., Whittingham, M.J. & Yalden, D.W. 2010. Impacts of climate on prey abundance account for fluctuations in a population of a northern wader at the southern edge of its range. *Global Change Biology*, **16**, 12-23
- Pellet, J., Schmidt, B.R., Fivaz, F., Perrin, N. & Grossenbacher, K. 2006. Density, climate and varying return points: an analysis of long-term population fluctuations in the threatened European tree frog. *Oecologia*, **149**, 65–71.
- Pérez-Ramos, I.M., Ourcival, J.M., Limousin, J.M. & Rambal, S. 2010. Mast seeding under increasing drought: results from a long-term data set and from a rainfall exclusion experiment. *Ecology*, **91**, 3057-3068.
- Piha, M., Linden, A., Pakkala, T. & Tiainen, J. 2007. Linking weather and habitat to population dynamics of a migratory farmland songbird. *Annales Zoologici Fennici*, **44**, 20-34.
- Piovesan, G. & Adams, J.M. 2001. Mast seeding behaviour in beech: linking reproduction and climatic variation. *Canadian Journal of Botany*, **79**, 1039-1047.
- Potti, J. 2009. Advanced breeding dates in relation to recent climate warming in a Mediterranean montane population of Blue Tits *Cyanistes caeruleus*. *Journal of Ornithology*, **150**, 893-901.
- Pucek, Z., Jedrzejewski, W., Jedrzejewska, B. & Pucek, M. 1993. Rodent population dynamics in a primeval deciduous forest (Bialowieza National Park) in relation to weather, seed crop, and predation. *Acta Theriologica*, **38**, 199-199.
- Pukkala, T., Hokkanen, T. & Nikkanen, T. 2010. Prediction models for the annual seed crop of Norway Spruce and Scots Pine in Finland. *Silva Fennica*, **44**, 629–642.
- Reading, C.J. 2007. Linking global warming to amphibian declines through its effects on female body condition and survivorship. *Oecologia*, **151**, 125-131.
- Redfern, M. & Hunter, M.D. 2005. Time tells: long-term patterns in the population dynamics of the yew gall midge, *Taxomyia taxi* (Cecidomyiidae), over 35 years. *Ecological Entomology*, **30**, 86–95.
- Rehmeier, R.L., Kaufman, G.A., Kaufman, D.W. & McMillan, B.R. 2005. Long-term study of abundance of the hispid cotton rat in native tallgrass prairie. *Journal of Mammalogy*, **86**, 670-676.

- Reif, J., Telensky, T., Stastny, K., Bejcek, V. & Klvana, P. (2010) Relationships between winter temperature and breeding bird abundance on community level: importance of interspecific differences in diet. *Folia Zoologica*, **59**, 313-322.
- Robillard, M.M. & Fox, M.G. 2006. Historical changes in abundance and community structure of warmwater piscivore communities associated with changes in water clarity, nutrients, and temperature. *Canadian Journal of Fisheries and Aquatic Sciences*, **63**, 798–809.
- Robinson, R.A., Green, R.E., Baillie, S.R., Peach, W.J. & Thomson, D.L. 2004. Demographic mechanisms of the population decline of the song thrush *Turdus philomelos* in Britain. *Journal of Animal Ecology*, **73**, 670-682.
- Robinson, R.A., Baillie, S.R. & Crick, H.Q.P. 2007. Weather-dependent survival: implications of climate change for passerine population processes. *Ibis*, **149**, 357–364.
- Roy, D.B., Rothery, P., Moss, D., Pollard, E. & Thomas, J.A. 2001. Butterfly numbers and weather: predicting historical trends in abundance and the future effects of climate change. *Journal of Animal Ecology*, **70**, 201–217.
- Schaub, M., Jakober, H. & Stauber, W. 2011. Demographic response to environmental variation in breeding, stopover and non-breeding areas in a migratory passerine. *Oecologia*, **167**, 445–459.
- Schorcht, W., Bontadina, F. & Schaub, M. 2009. Variation of adult survival drives population dynamics in a migrating forest bat. *Journal of Animal Ecology*, **78**, 1182–1190.
- Schwartz, O.A. & Armitage, K.B. 2005. Weather influences on demography of the yellow-bellied marmot (*Marmota flaviventris*). *Journal of Zoology*, **265**, 73-79.
- Selås, V. 2001. Autumn population size of capercaillie *Tetrao urogallus* in relation to bilberry *Vaccinium myrtillus* production and weather: an analysis of Norwegian game reports. *Wildlife Biology*, **7**, 17-25.
- Sherriff, R.L., Berg, E.E. & Miller, A.E. 2011. Climate variability and spruce beetle (*Dendroctonus rufipennis*) outbreaks in south-central and southwest Alaska. *Ecology*, **92**, 1459–1470.
- Shone, S.M., Curriero, F.C., Lesser, C.R. & Glass, G.E. 2006. Characterizing population dynamics of *Aedes sollicitans* (Diptera: Culicidae) using meteorological data. *Journal of Medical Entomology*, **43**, 393-402.
- Simpson, D.C., Harveson, L.A., Brewer, C.E., Walser, R.E. & Sides, A.R. 2007. Influence of Precipitation on Pronghorn Demography in Texas. *The Journal of Wildlife Management*, **71**, 906–910.
- Šmatas, R., Semaškienė, R. & Lazauskas, S. 2008. The impact of the changing climate conditions on the importance of the Colorado Potato Beetle (*Leptinotarsa decemlineata*). *Zemdirbyste-Agriculture*, **95**, 235–241.
- Sokolov, L.V., Tropp, E.A., Morozov, Y.G. & Yefremov, V.D. 2002. The Effect of Climate on Long-Term Fluctuations of the Numbers of Passerine Birds. *Doklady Biological Sciences*, **384**, 246–249.
- Solberg, E.J., Jordhøy, P., Strand, O., Aanes, R., Loison, A., Sæther, B.E. & Linnell, J.D.C. 2001. Effects of density-dependence and climate on the dynamics of a Svalbard reindeer population. *Ecography*, **24**, 441-451.

- Surmacki, A. & Stepniewski, J. 2007. Do weather conditions affect the dynamics of bearded tit *Panurus biarmicus* populations throughout the year? A case study from western Poland. *Annales Zoologici Fennici*, **44**, 35-42.
- Suski, C.D., Ridgway, M.S. 2007. Climate and body size influence nest survival in a fish with parental care. *Journal of Animal Ecology*, **76**, 730-739.
- Szeicz, J.M. & Macdonald, G.M. 1995. Recent White Spruce Dynamics at the Subarctic Alpine Treeline of North-Western Canada. *The Journal of Ecology*, **83**, 873.
- Thingstad, P.G., Nyholm, N.E.I & Fjeldheim, B. 2006. Pied Flycatcher *Ficedula hypoleuca* population dynamics in peripheral habitats in Scandinavia. *Ardea*, **94**, 211–223.
- Tratalos, J.A., Cheke, R.A., Healey, R.G. & Stenseth, N.C. 2010. Desert locust populations, rainfall and climate change: insights from phenomenological models using gridded monthly data. *Climate Research*, **43**, 229-239.
- Visser, M.E., Holleman, L.J. & Gienapp, P. 2006. Shifts in caterpillar biomass phenology due to climate change and its impact on the breeding biology of an insectivorous bird. *Oecologia*, **147**, 164-172.
- Vucetich, J.A. & Peterson, R.O. 2004. The influence of top–down, bottom–up and abiotic factors on the moose (*Alces alces*) population of Isle Royale. *Proceedings of the Royal Society of London. Series B: Biological Sciences*, **271**, 183-189.
- Wang, G., Hobbs, N.T., Giesen, K.M., Galbraith, H., Ojima, D.S. & Braun, C.E. 2002a. Relationships between climate and population dynamics of white-tailed ptarmigan *Lagopus leucurus* in Rocky Mountain National Park, Colorado, USA. *Climate Research*, **23**, 81–87.
- Wang, G., Hobbs, N.T., Singer, F.J., Ojima, D.S. & Lubow, B.C. 2002b. Impacts of Climate Changes on Elk Population Dynamics in Rocky Mountain National Park, Colorado, U.S.A. *Climatic Change*, **54**, 205–223.
- Watson, A., Moss, R. & Rae, S. 1998. Population dynamics of Scottish rock ptarmigan cycles. *Ecology*, **79**, 1174-1192.
- Watson, A., Moss, R. & Rothery, P. 2000. Weather and synchrony in 10-year population cycles of Rock Ptarmigan and Red Grouse in Scotland. *Ecology*, **81**, 2126–2136.
- Wedekind, C. & Küng, C. 2010. Shift of spawning season and effects of climate warming on developmental stages of a grayling (Salmonidae). *Conservation biology: the journal of the Society for Conservation Biology*, **24**, 1418–1423.
- Whitfield, D.P., Fielding, A.H. & Whitehead, S. 2008. Long-term increase in the fecundity of hen harriers in Wales is explained by reduced human interference and warmer weather. *Animal Conservation*, **11**, 144–152.
- Whittaker, J.B. & Tribe, N.P. 1998. Predicting numbers of an insect (*Neophilaenus lineatus* : Homoptera) in a changing climate. *Journal of Animal Ecology*, **67**, 987-991

- Wilson, S., LaDeau, S.L., Tøttrup, A.P. & Marra, P.P. 2011. Range-wide effects of breeding- and nonbreeding-season climate on the abundance of a Neotropical migrant songbird. *Ecology*, **92**, 1789–1798.
- Winkler, D.W., Dunn, P.O. & McCulloch, C.E. 2002. Predicting the effects of climate change on avian life-history traits. *Proceedings of the National Academy of Sciences*, **99**, 13595-13599.
- Woodward, A., Silsbee, D.G., Schreiner, E.G. & Means, J.E. 1994. Influence of climate on radial growth and cone production in subalpine fir (*Abies lasiocarpa*) and mountain hemlock (*Tsuga mertensiana*). *Canadian journal of forest research*, **24**, 1133-1143.
- Wool, D. 2002. Herbivore abundance is independent of weather? A 20-year study of a galling aphid *Baizongia pistaciae* (Homoptera: Aphidoidea). *Population Ecology*, **44**, 0281–0291.
- Wrege, P.H., Shuford, W.D., Winkler, D.W. & Jellison, R. 2006. Annual variation in numbers of breeding California Gulls at Mono Lake, California: The importance of natal philopatry and local and regional conditions. *Condor*, **108**, 82-96
- Wright, L.J., Hoblyn, R.A., Green, R.E., Bowden, C.G.R., Mallord, J.W., Sutherland, W.J. & Dolman, P.M. 2009. Importance of climatic and environmental change in the demography of a multi-brooded passerine, the woodlark *Lullula arborea*. *Journal of Animal Ecology*, **78**, 1191–1202.
- Yalden, D.W. & Pearce-Higgins, J.W. 1997. Density-dependence and winter weather as factors affecting the size of a population of Golden Plovers *Pluvialis apricaria*. *Bird Study*, **44**, 227–234.
- Yamamura, K., Yokozawa, M., Nishimori, M., Ueda, Y. & Yokosuka, T. 2006. How to analyze long-term insect population dynamics under climate change: 50-year data of three insect pests in paddy fields. *Population Ecology*, **48**, 31–48.
- Zhang, Z., Pech, R., Davis, S., Shi, D., Wan, X. & Zhong, W. 2003. Extrinsic and intrinsic factors determine the eruptive dynamics of Brandt's voles *Microtus brandti* in Inner Mongolia, China. *Oikos*, **100**, 299–310.
- Zhang, Z., Xu, L., Guo, C., Wang, Y. & Guo, Y. 2010. Effect of ENSO-driven precipitation on population irruptions of the Yangtze vole *Microtus fortis calamorum* in the Dongting Lake region of China. *Integrative Zoology*, **5**, 176–184.
- Zmihorski, M., Zmihorski, D., Romanowski, J., Kowalski, M. & Osojca, G. 2006. Long-term decline of the Little Owl [*Athene noctua* Scop., 1769] in Central Poland. *Polish Journal of Ecology*, **54**.
